# Supplementary material
Source: PubMed Central journal article supplement (PMC2771320)
Supplement: NIHMS150912-supplement-1_si_001.pdf [file NIHMS150912-supplement-1_si_001.pdf]

September 16, 2009

**Supplementary Information for:**  
**Quantitative measurement of zinc secretion from pancreatic islets with high temporal resolution using droplet-based microfluidics**

Christopher J. Easley<sup>1, †</sup>, Jonathan V. Rocheleau<sup>1, ‡</sup>, W. Steven Head<sup>1</sup>, David W. Piston<sup>1, 2, \*</sup>

<sup>1</sup> Vanderbilt University, Molecular Physiology and Biophysics, Vanderbilt University Medical Center, 702 Light Hall, Nashville, TN 37232, USA

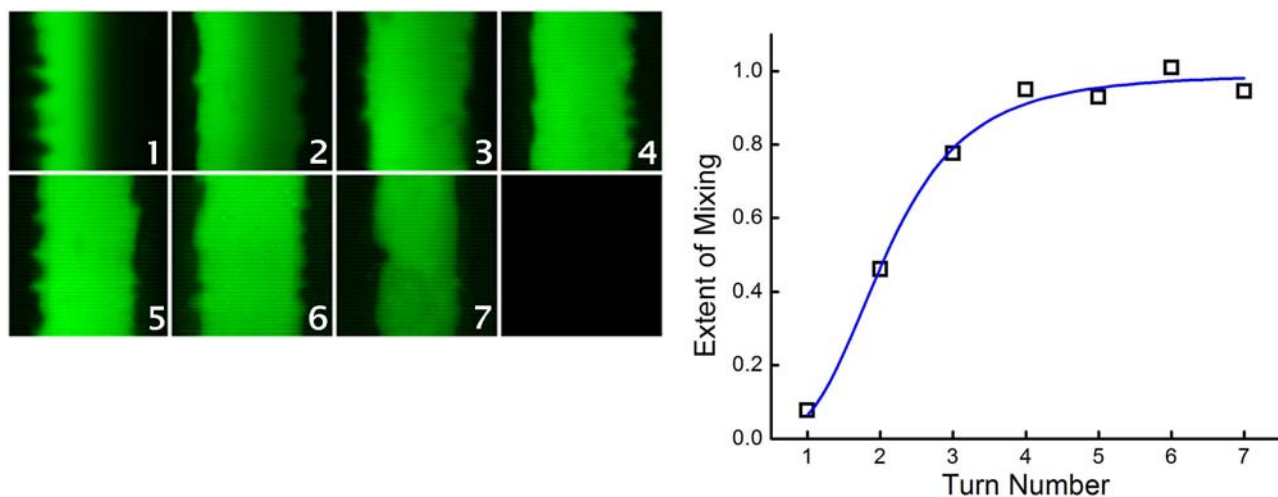

**Figure S1. Diffusive mixing during calibration.** To confirm that diffusive mixing was complete at the droplet formation region during on-chip calibrations (**Fig. 3C** of manuscript), each turn of the aqueous channel ( $R_{aq}$ ) was imaged during calibration flow conditions at 37 °C. **(A)** Diffusive mixing was essentially complete by turn 4 of 7 in the aqueous channel. **(B)** Image analysis confirmed this result.

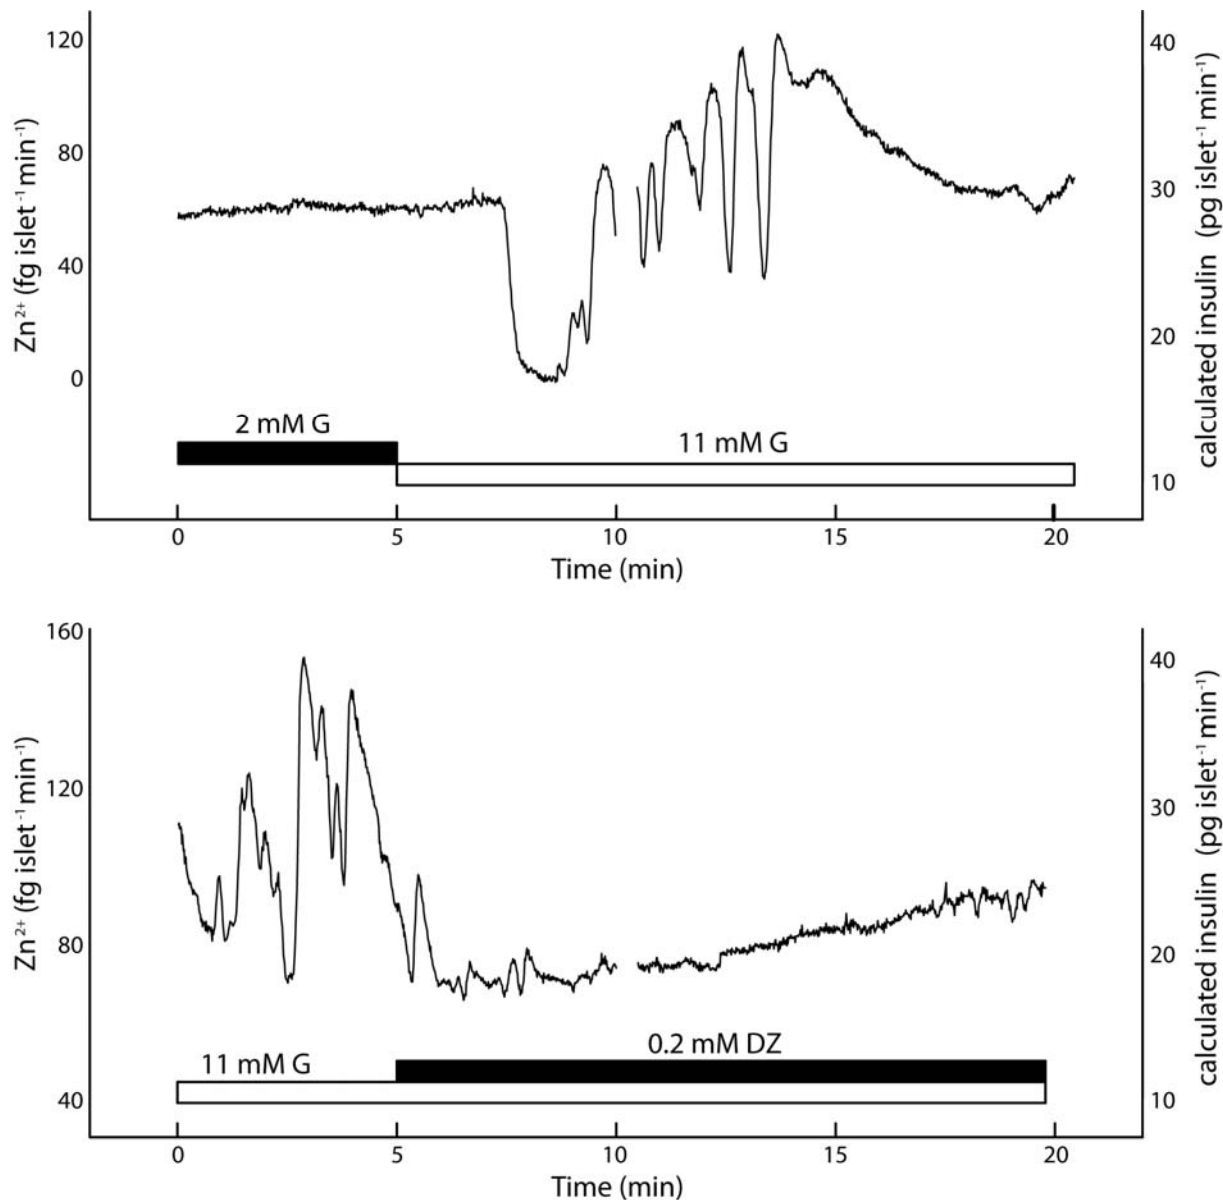

**Figure S2. Additional zinc secretion measurements from single islets.** (A) A third starved islet (referred to here as islet Z5) was treated with 11 mM glucose (G) after 5 min of sampling and measurement, with similar responses observed (no diazoxide treatment, compared to **Fig. 4** in text). (B) A third unstarved islet (referred to as islet Z6) was treated with diazoxide (DZ), showing a similar loss of secretory activity compared to **Fig. 6A**.

## Matlab Code

### Droplock10.m

```
% Version 10 of this code reworked the lock-in method. The masking
% procedure now uses only an aqueous mask, multiplying data inside the
% droplets by the 'gain' factor (an input now), then dividing all data by
% the same 'gain' factor before averaging by summing and dividing.
%
% This code is designed to load data that has been uploaded as raw files of
% the names 'red' and 'green'. These files were videos from the LSM 5Live
% that have been pre-loaded as '.raw' files by ImageJ.
%
% IMPORTANT NOTE ON DIMENSIONALITY: ImageJ saves '.raw' files as a
% continuous data set, with each point representing the pixels of the image
% starting from top-left, scanning left-to-right, and ending on bottom-
% right. Each frame of a video is then scanned. For example, a 128x32
% image with 1000 frames would give 128*32=4096 data points before moving
% to the second frame. Thus, this '.raw' file would have 4,096,000 data
% points. This scanning effect, as defined by ImageJ, is different than
% the display as defined by Matlab. Therefore, in this m-file, the matrix
% of the '.raw' file is loaded, then transposed to allow the images to be
% displayed the same as ImageJ, on-screen.
%
% An example of how to pre-load the data is:
% clear
% fid = fopen('oil_stack.raw','r');
% tic; red = fread(fid,'uchar'); toc
% fid = fopen('aq_stack.raw','r');
% tic; green = fread(fid,'uchar'); toc
%
% An example command to run this file is:
% [Saq, Sbg, S] = DropLock10(green, red, 40, 0, 1000);
%
% Also, an example command set to run for multiple folders is:
% tic;
% for n = 1:600
% [Saq, Sbg, S] = DropLock10(green, red, 40, (n-1)*40, 1000);
% dataset(n,:) = [Saq; Sbg; S];
% n
% toc
% end;
% save filename.txt dataset -ascii -double -tabs;
%
%
% Inputs: 1) aqueous data ('green')
```

---

```

%      2) oil data ('red')
%      3) width of ROI in X-axis
%      4) width of ROI in Y-axis
%      5) number of frames to load
%      6) starting frame
%      7) gain of lock-in
%
% Outputs: 1) aqueous fluorescence signal (Saq)
%          2) background fluorescence signal (Sbg)
%          3) Saq - Sbg (S)
%
function[Saq, Sbg, S] = ...
    DropLock10(green, red, dx, dy, frames, start, gain)

% Open droplet data, and process.

%tic
FrameStart=start;
FrameEnd=start+frames-1;
TSize = frames;

XSize = dx;
YSize = dy;
TSize = frames;

% Load data. Transpose matrix due to RAW data file reading direction.
oil = zeros(128,32,TSize);
oil2 = zeros(32,128,TSize);
for t=start+1:start+TSize
for y=1:32
oil(:,y,t-start) = red(((t-1)*32*128 + (y-1)*128+1:(t-1)*32*128 + y*128,1));
end
oil2(:,y,t-start)=oil(:,y,t-start).'; % Note the transpose operation --> .'
end
%figure; imshow(oil(:,y,1),[0 255]);
%figure; imshow(oil2(:,y,1),[0 255]);

clear oil

% Redefine X and Y sizes to define 'Data_oil'.
XSize = dy;

```

---

```

YSize = dx;

Data_oil = zeros(XSize,YSize,TSize);
if rem(XSize,2)>0
    sub=(XSize-3)/2;
    add=(XSize+1)/2;
else
    sub=(XSize-2)/2;
    add=(XSize)/2;
end
Data_oil(:,:,) = double(oil2(32/2-sub:32/2+add,128-YSize+1:128,...
    1:frames));
clear red
clear oil2

%figure; imshow(Data_oil(:,:,1),[0 255]);

%'loaded oil files'
%'size of Data_oil'
%size(Data_oil)
%toc

% Median filter gives the background level in the oil signal for
% normalization.A 3x3 mean filter (Mxy) is also applied to the image.

Mxy = [1/9,1/9,1/9; 1/9,1/9,1/9; 1/9,1/9,1/9];
medo = median(Data_oil,3);
medo3D = zeros(XSize,YSize,TSize);
normo = zeros(XSize,YSize,TSize);

medo = conv2(medo,Mxy,'same');

for t=1:TSize
    medo3D(:,:,t) = medo;
end

normo = Data_oil./medo3D;
%'size of medo3D'
%size(medo3D)

clear Data_oil

% Sobel edge detection (derivative) kernels are generated (Gx & Gy), and

```

---

```
% the edge detection is used to produce masks for spatial lock-in. A 3x3
% mean filter (Mxy) is also applied to the edge images.
```

```
Mxy = [1/9,1/9,1/9; 1/9,1/9,1/9; 1/9,1/9,1/9];
Gx = [1,2,1; 0,0,0; -1,-2,-1]; Gy = [1,0,-1; 2,0,-2; 1,0,-1];
Xder = zeros(XSize,YSize);
Yder = zeros(XSize,YSize);
edges = zeros(XSize,YSize,TSize);

for t = 1:TSize
    Xder = conv2(normo(:,:,t),Gx,'same');
    Yder = conv2(normo(:,:,t),Gy,'same');
    edges(:,:,t) = conv2(sqrt(Xder.*Xder + Yder.*Yder),Mxy,'same');
end
%'Edges detected'
%toc
```

```
% Create binary images from the edges.
edges = edges./(max(max(max(edges))));
level = graythresh(edges);
edgesbw = zeros(XSize,YSize,TSize);
```

```
for t = 1:TSize
    edgesbw(:,:,t) = im2bw(edges(:,:,t), level);
end
%'Binary images created'
```

```
% Create oil and aqueous masks.
normo = normo./(max(max(max(normo))));
normobw = zeros(XSize,YSize,TSize);
masko = zeros(XSize,YSize,TSize);
maska = zeros(XSize,YSize,TSize);
```

```
level = graythresh(normo);
```

```
for t = 1:TSize
    normobw(:,:,t) = im2bw(normo(:,:,t), level);
end
```

```
edgesbw = ~edgesbw;
```

```
masko = edgesbw.*normobw;
maska = edgesbw.*(~normobw);
zerobar = zeros(2,YSize,TSize);
```

```
% Aqueous mask is now changed to lock-in mask (1000's and 1's).
```

```
maska = (maska*(gain-1))+1;
```

```
% Chop off top and bottom bars (2 pix) of aq mask due to filtering anomalies.
```

```
masko(1:2, :, :) = zero;
masko(XSize-1:XSize, :, :) = zero;
maska(1:2, :, :) = zero;
maska(XSize-1:XSize, :, :) = zero;
%'masks generated'
%toc
```

```
%figure; imshow(masko(:, :, 1), [0 255]);
%figure; imshow(maska(:, :, 1), [0 255]);
%size(masko)
%size(maska)
% (to check mask generation)
%pause
```

```
% Load aq data. Transpose matrix due to RAW data file reading direction.
```

```
aq = zeros(128, 32, TSize);
aq2 = zeros(32, 128, TSize);
for t=start+1:start+TSize
for y=1:32
aq(:, y, t-start) = green((t-1)*32*128 + (y-1)*128+1:(t-1)*32*128 + y*128, 1);
end
aq2(:, :, t-start)=aq(:, :, t-start).'; % Note the transpose operation --> .'
end
%figure; imshow(aq(:, :, 1), [0 255]);
%figure; imshow(aq2(:, :, 1), [0 255]);
```

```
clear aq
```

```
% Redefine X and Y sizes to define 'Data_oil'.
```

```
XSize = dy;
YSize = dx;
```

```
Data_aq = zeros(XSize, YSize, TSize);
Data_aq(:, :, :) = double(aq2(32/2-sub:32/2+add, 128-YSize+1:128, ...
1:frames));
clear green
```

---

```

clear aq2

%figure; imshow(Data_aq(:,:,1),[0 255]);

%'loaded aqueous files'
%'size of Data_aq'
%size(Data_aq)
%toc

% Aqueous data is masked, and sums are calculated.

AQ = zeros(XSize,YSize,TSize);
BG = zeros(XSize,YSize,TSize);

normo = normo./(median(median(median(normo))));

for t = 1:TSize
    AQ(:,:,t) = (Data_aq(:,:,t).*maska(:,:,t))/gain;
    BG(:,:,t) = Data_aq(:,:,t).*masko(:,:,t);
end

%figure; imshow(AQ(:,:,1));
%figure; imshow(BG(:,:,1));
%AQ(1:10,1:10,1)
%BG(1:10,1:10,1)
%pause

%'AQsum'
AQsum = sum(sum(sum(AQ)));
BGsum = sum(sum(sum(BG)));
%'BGsum'

%Mask images are summed to get relative contributions.
%'AQrel'
AQrel = sum(sum(sum((maska-1)/(gain-1))));
%'BGrel'
BGrel = sum(sum(sum(masko)));

Saq = zeros(1); Sbg = zeros(1);

%Divide the sum of the line sums by the number of pixels to get
%intensity per pixel.

```



Saq = AQsum/AQrel;  
Sbg = BGsum/BGrel;  
S = Saq - Sbg;

%toc

**Matlab Code**  
**ZincDrops.m**

```
%
% This code is designed to use 'DropLock10.m' in order to analyze zinc
% secretion measurements made with the LSM 5Live using a droplet sampling
% microfluidic device.
%
% The number of files is defined by how many sections the user splits the
% video into with ImageJ. The fastest method has been empirically
% determined (on a fast computer) to be 3 files of 8000 frames each,
% totaling the 24000 frames collected over 10 minutes (40 Hz). We also
% suggest a gain of at least 1000.
%
% An example of running this code is below:
%
% fulldata = ZincDrops('i1_11mMG_0', 3, 1000);
%
%
%
% Inputs:  1) 'base filename'
%         2) number of files to load
%         3) gain of droplet lock-in
%
% Outputs: 1) data set for fluorescent detection of zinc secretions
%
function[fulldata] = ...
    ZincDrops(base, files, gain)

clear fulldata

for m = 1:files
status = ['starting file ' num2str(m) ' of ' num2str(files)]

clear green red

fid = fopen([base '_red' num2str(m) '.raw'],'r');
tic; red = fread(fid,'uchar'); toc
fid = fopen([base '_green' num2str(m) '.raw'],'r');
tic; green = fread(fid,'uchar'); toc
```

```
tic;

for n = 1:600/files
    [Saq, Sbg, S] = DropLock10(green, red, 107, 23, 40, (n-1)*40, gain);
    dataset(n,:,m) = [Saq; Sbg; S];
    if rem(n,50)<1
        n
    else
        end
    end;

clear green red

toc

end

for x = 1:m
    fulldata(1+(x-1)*n:x*n,:)=dataset(:,x);
end

save([base '_g' num2str(gain) '.txt'], 'fulldata', '-ascii', '-double', '-tabs');

plot(fulldata(:,3));
```
